# Supplementary material for: Assessing the impact of ultra-thin diamond nanothreads on the glass transition temperature of a bituminous binder
Source: Royal Society of Chemistry journal article supplement (doi:10.1039/d3na00622k), 2023-01-01
Supplement: d3na00622k1.pdf [file d3na00622k1.pdf]

*Supplementary Information*

**Assessing the Impact on the Glass Transition Temperature of  
Bituminous Binder from Ultra-thin Diamond Nanothread**

Yingying Pang<sup>1</sup>, Liangfeng Sun<sup>2,3</sup>, Haifei Zhan<sup>1,2,4\*</sup>, Xianglong Zheng<sup>2,5</sup>, Jiandong  
Zhang<sup>1</sup>, Chengyou Bian<sup>6</sup>, and Chaofeng Lü<sup>7,1,\*</sup>

<sup>1</sup>*College of Civil Engineering and Architecture, Zhejiang University, Hangzhou  
310058, P.R. China*

<sup>2</sup>*Center for Balance Architecture, Zhejiang University, Hangzhou 310028, P.R. China*

<sup>3</sup>*Architectural Design and Research Institute of Zhejiang University Co., Ltd.,  
Hangzhou 310028, China*

<sup>4</sup>*School of Mechanical, Medical and Process Engineering, Queensland University of  
Technology (QUT), Brisbane QLD 4001, Australia*

<sup>5</sup>*Faculty of Engineering, Hangzhou City University, Hangzhou 310015, P.R. China*

<sup>6</sup>*ZCCC Hongtu Transportation Construction Co., Ltd., Hangzhou 310051, P.R. China*

<sup>7</sup>*Faculty of Mechanical Engineering & Mechanics, Ningbo University, Ningbo  
315211, P.R. China*

**\*Corresponding Authors:**

Dr. Haifei Zhan, College of Civil Engineering and Architecture, Zhejiang University,  
Hangzhou 310058, P.R. China, [zhan\\_haifei@zju.edu.cn](mailto:zhan_haifei@zju.edu.cn)

Prof. Chaofeng Lü, Faculty of Mechanical Engineering & Mechanics, Ningbo  
University, Ningbo 315211, P.R. China, [lucf@nbu.edu.cn](mailto:lucf@nbu.edu.cn)

## S1. Model information for the DNT modified bituminous binder

Details of the atomistic models established in this work. Here DNT with random dispersion and uniform alignment are named as BB-DNT<sup>R</sup> and BB-DNT<sup>A</sup>, respectively. The incorporation of functional groups in a 5.05wt% system leads to a variation in the weight percentage since the calculation of DNT mass involves the inclusion of functional groups. Moreover, the addition of the same number of DNTs may also result in fluctuation of wt% due to the difference in the number of bitumen molecules in different systems.

**Table S1.** Detailed composites of DNT modified bitumen models.

| Model                                                                     | Numbers of molecules |           |                 |          |     | Total atom numbers | DNT wt% |
|---------------------------------------------------------------------------|----------------------|-----------|-----------------|----------|-----|--------------------|---------|
|                                                                           | Asphaltene           | Naphthene | Polar aromatics | Saturate | DNT |                    |         |
| Neat                                                                      | 99                   | 149       | 170             | 467      | 0   | 51421              | 0.00    |
| BB-5.06wt%DNT <sup>AI</sup>                                               | 96                   | 143       | 164             | 451      | 12  | 52052              | 5.07    |
| BB-5.06wt%DNT <sup>AI</sup>                                               | 96                   | 144       | 164             | 451      | 12  | 52076              | 5.06    |
| BB-5.06wt%DNT <sup>AI</sup>                                               | 96                   | 144       | 164             | 451      | 12  | 52076              | 5.06    |
| BB-5.06wt%DNT <sup>AI</sup>                                               | 96                   | 143       | 164             | 451      | 12  | 52052              | 5.07    |
| BB-5.06wt%DNT <sup>AV</sup>                                               | 96                   | 144       | 164             | 452      | 12  | 52144              | 5.06    |
| BB-1.29wt%DNT <sup>R</sup>                                                | 98                   | 147       | 168             | 463      | 3   | 51524              | 1.29    |
| BB-2.56wt%DNT <sup>R</sup>                                                | 97                   | 146       | 167             | 459      | 6   | 51681              | 2.56    |
| BB-3.81wt%DNT <sup>R</sup>                                                | 97                   | 145       | 165             | 455      | 9   | 51919              | 3.81    |
| BB-5.05wt%DNT <sup>R</sup>                                                | 96                   | 144       | 165             | 453      | 12  | 52242              | 5.05    |
| BB-6.30wt%DNT <sup>R</sup>                                                | 95                   | 142       | 163             | 447      | 15  | 52209              | 6.30    |
| BB-8.37wt%DNT <sup>R</sup>                                                | 93                   | 140       | 160             | 440      | 20  | 52243              | 8.37    |
| BB-5.81wt%DNT <sup>R</sup> -CH <sub>3</sub> <sup>15%</sup>                | 95                   | 142       | 162             | 447      | 12  | 52053              | 5.81    |
| BB-6.56wt%DNT <sup>R</sup> -C <sub>2</sub> H <sub>5</sub> <sup>15%</sup>  | 95                   | 140       | 160             | 441      | 12  | 51894              | 6.56    |
| BB-9.09wt%DNT <sup>R</sup> -C <sub>6</sub> H <sub>5</sub> <sup>15%</sup>  | 93                   | 139       | 159             | 437      | 12  | 52081              | 8.96    |
| BB-7.31wt%DNT <sup>R</sup> -COOH <sup>15%</sup>                           | 94                   | 142       | 162             | 445      | 12  | 51806              | 7.31    |
| BB-6.31wt%DNT <sup>R</sup> -C <sub>6</sub> H <sub>5</sub> <sup>5%</sup>   | 94                   | 141       | 162             | 444      | 12  | 51726              | 6.31    |
| BB-7.78wt%DNT <sup>R</sup> -C <sub>6</sub> H <sub>5</sub> <sup>10%</sup>  | 94                   | 140       | 160             | 441      | 12  | 52038              | 7.78    |
| BB-8.96wt%DNT <sup>R</sup> -C <sub>6</sub> H <sub>5</sub> <sup>15%</sup>  | 93                   | 139       | 159             | 437      | 12  | 52081              | 8.96    |
| BB-10.47wt%DNT <sup>R</sup> -C <sub>6</sub> H <sub>5</sub> <sup>20%</sup> | 91                   | 137       | 157             | 431      | 12  | 51943              | 10.47   |
| BB-5.79wt%DNT <sup>R</sup> -COOH <sup>5%</sup>                            | 95                   | 142       | 162             | 447      | 12  | 51729              | 5.79    |
| BB-6.61wt%DNT <sup>R</sup> -COOH <sup>10%</sup>                           | 95                   | 142       | 163             | 447      | 12  | 51939              | 6.61    |
| BB-7.31wt%DNT <sup>R</sup> -COOH <sup>15%</sup>                           | 94                   | 142       | 162             | 445      | 12  | 51806              | 7.31    |
| BB-8.15wt%DNT <sup>R</sup> -COOH <sup>20%</sup>                           | 94                   | 141       | 161             | 443      | 12  | 51796              | 8.15    |

## S2. Calculation of elastic modulus performed by tensile simulation.

The elastic modulus is calculated from  $E=\sigma/\varepsilon$ , where  $\sigma$  refers to the stress and  $\varepsilon$  refers to the strain. We simulated the system under tensile stress in the x-direction at a temperature of  $T=300\text{K}$  and pressure of  $p=1\text{atm}$ . The total strain during the tensile process was 20%. Based on the stress-strain curve, the elastic range is selected as the strain changes from 0 to 0.06. Taking the stress-strain within this range, the calculated elastic modulus is about 1153 MPa.

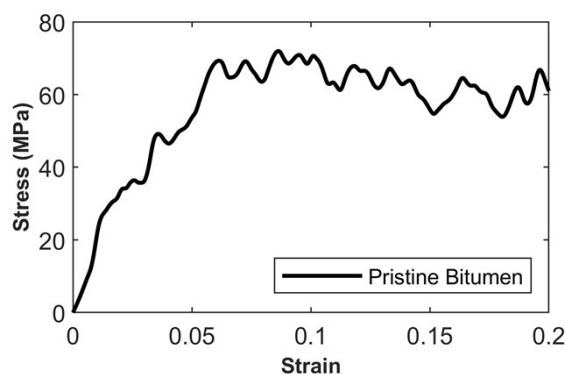

**Figure S1.** Stress-strain curve of pristine bitumen in the x-direction.

## S3. Distance between the axes of two adjacent DNTs

When  $-\text{C}_2\text{H}_5$  functionalization reaches 5%,  $T_g$  appears to be significantly reduced. To exclude potential numerical errors, additional calculations are conducted for three different models with 5%  $-\text{COOH}$  (by varying the dispersion of the DNTs), from which a uniformly decreased  $T_g$  is observed. According to the atomic configurations and distance calculation between adjacent DNTs, the reduction in  $T_g$  is most pronounced when the DNTs are under the most dispersed distribution and the asphaltene has the lowest degree of aggregation.

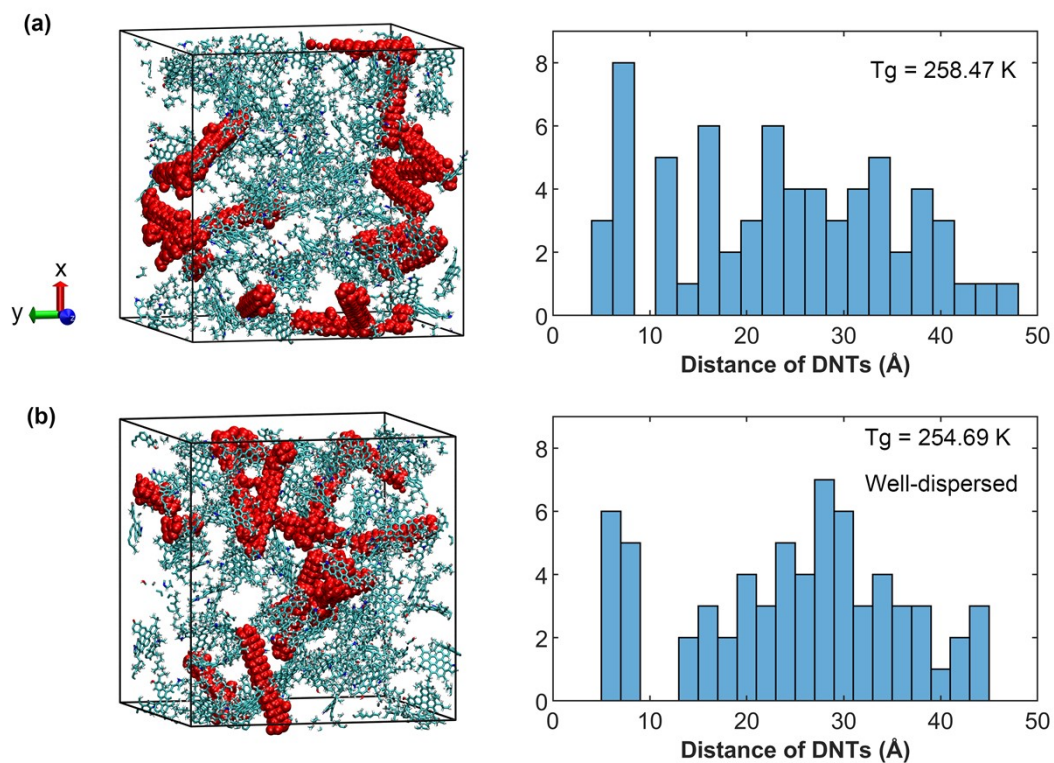

**Figure S2.** (a) The atomistic model (left panel) and the distribution probability of the distance between adjacent DNTs in a random distribution fashion (right panel). (b) The atomistic model (left panel) and the distribution probability of the distance between adjacent DNTs in a random distribution fashion (right panel), where DNTs effectively disaggregate the asphaltene molecules.

#### S4. Pearson correlation coefficient (PCC) for different molecules

By calculating the Pearson correlation coefficient, the molecules with the highest correlation coefficient can be considered as one of the key factors affecting the glass transition temperature.

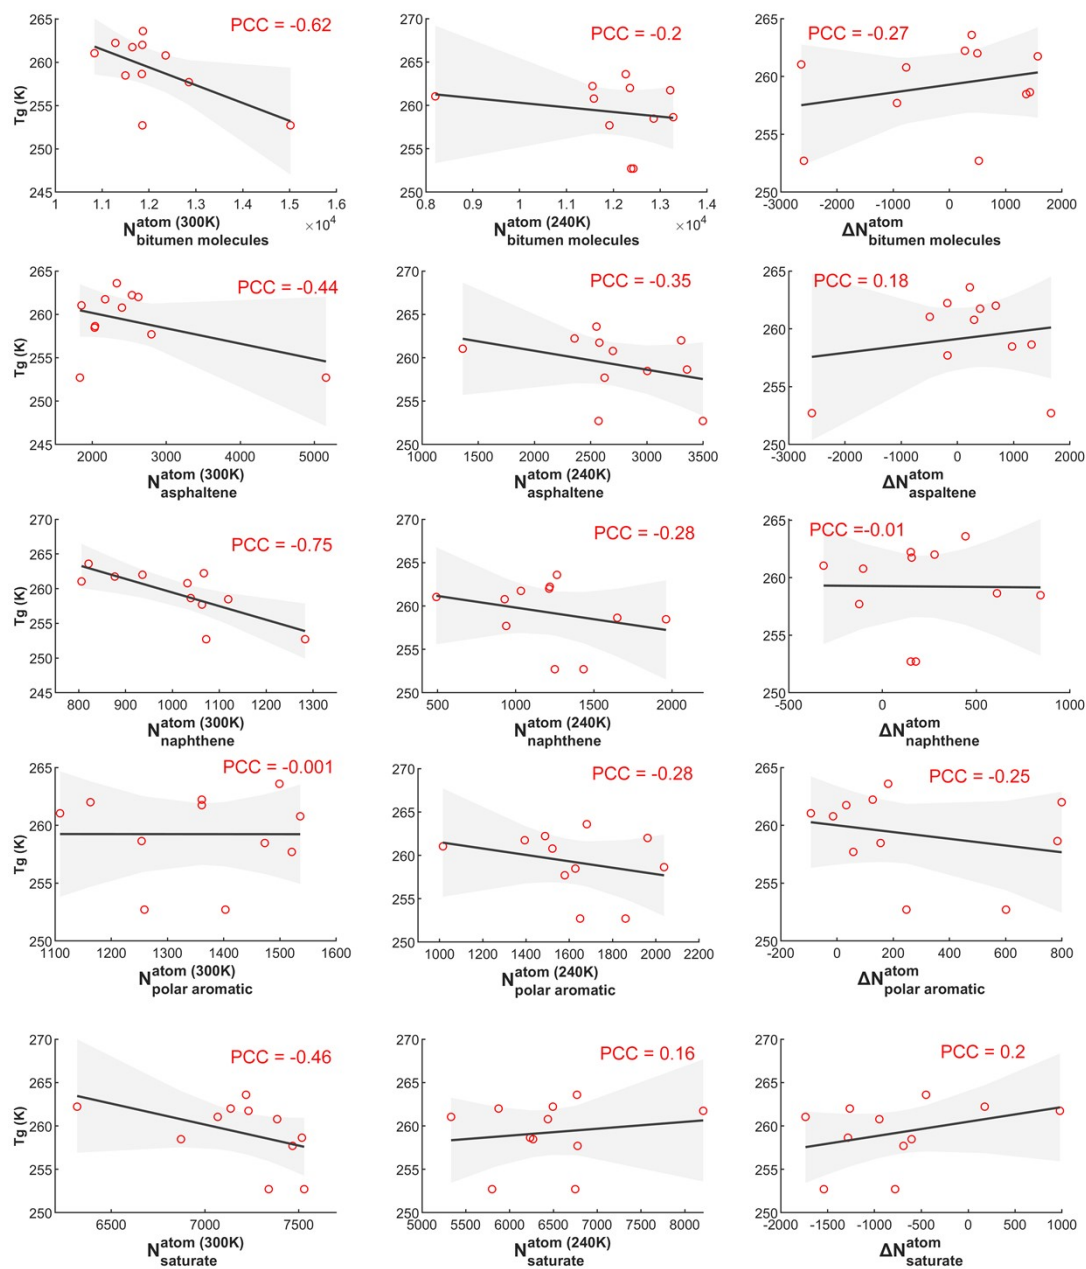

**Figure S3.** Pearson correlation coefficient (PCC) between the atom number and number loss around DNTs and  $T_g$  at radius of 15 Å under different temperatures. Here  $\Delta N^{atom} = N^{atom(240K)} - N^{atom(300K)}$ .
